# Supplementary material
Source: publisher site journal article supplement (http://content.karger.com/ProdukteDB/miscArchiv/000/106/059/Suppl_Table.pdf)
Supplement: Supplementary file 1 [file Suppl_Table.pdf]

Supplementary Table 1 - Sequence primers to amplify flanker and specific regions of the Y chromosome SNPs used to characterize haplogroup: simplex minisequencing protocols.

| Y chromosome marker       | Sequence 5'-3'                                                                      | Product size (bp) | Mutation | Primer tail 5'-3'               | Target sequence 5'-3'           | Total primer size (nt) | Ancestral Allele (nt) | Derived Allele (nt) |
|---------------------------|-------------------------------------------------------------------------------------|-------------------|----------|---------------------------------|---------------------------------|------------------------|-----------------------|---------------------|
| <b>Multiplex Y D/E a*</b> |                                                                                     |                   |          |                                 |                                 |                        |                       |                     |
| PN2                       | F: GGTAACACCCATAAAGGTTG <sup>a</sup><br>R: TTCACTACCAGCCTAAGTAC <sup>a</sup>        | 247               | C/T      | -                               | CCCTAGGAGGAGAA                  | 15                     | 16 (C)                | 17 (T)              |
| M174                      | F: CTCCGTCACAGCAAAAAAT<br>R: AAAAGGAGAAGGACAAGACC                                   | 180               | T/C      | -                               | ATGCACCCCTCACTTCTGCACT          | 22                     | 24 (T)                | 23 (C)              |
| SY81                      | F: AGGCACTGGTCAGAAATGAAG <sup>a</sup><br>R: AATGGAAAATACAGCTCCCC <sup>a</sup>       | 209               | G/A      | -                               | TTATATTTTCATTGTAAACAAAAGT<br>CC | 26                     | 29 (A)                | 27 (G)              |
| M145                      | F: ACTTGCTCCACGACTTT<br>R: CTTTTGGATCATGGTCTT                                       | 82                | G/A      | TCGTGAAAGTCTGACAA               | GACACCAGAAAAGAAAGGC             | 35                     | 36 (G)                | 38 (A)              |
| <b>Multiplex Y D/E b*</b> |                                                                                     |                   |          |                                 |                                 |                        |                       |                     |
| M35                       | F: CATTTCATCTTTTTGTCC<br>R: TAATCCATGCAGACTTTC                                      | 143               | G/C      | -                               | TTTTCTTTGGGACACTG               | 18                     | 19 (G)                | 20 (A)              |
| M33                       | F: ATACTGGCTTCTGTTCAA<br>R: CTTACAATGGGAGTCACT                                      | 165               | A/C      | GCCACGTCGTGAAAGTCTGACAA         | GTATAATATGTCTGAGAT              | 41                     | 49 (A)                | 42 (C)              |
| M75                       | F: AAAGTCACATTCCACACA<br>R: GCATTTGTGAATTTTTAT                                      | 224               | G/A      | AGGTGCCACGTCGTGAAAGTCTGA<br>CAA | AATTATCAAACCACATCC              | 45                     | 46 (G)                | 58 (A)              |
| <b>Multiplex Y E3a**</b>  |                                                                                     |                   |          |                                 |                                 |                        |                       |                     |
| M58                       | F: CCTCTTAACTGTAGAAACA<br>R: AAAAATAAACTCTAAATCTCT                                  | 202               | G/A      | -                               | TTG TCTTCTGCAGAATTGGC           | 20                     | 22 (G)                | 21 (A)              |
| M191                      | F: ACAGCGAGCAGTAAGTAAAAC<br>R: TACCCAGACACACCAAAATAT                                | 152               | T/G      | AGTCTGACAA                      | AAAATATCTCATATTTTCAT            | 30                     | 31 (T)                | 33 (G)              |
| M116.2                    | F: AAAAAGTCAAGTAGATGAAAA<br>R: AAATAACTCACCAAAGGAAATG                               | 218               | A/C      | GAAAGTCTGACAA                   | AAAAAATAATTTCAAAGTATA           | 35                     | 36 (A)                | 42 (C)              |
| M10                       | F: AAGACAATGAAGGGAGAGACT<br>R: TTTCTGTTCTTTCACTTCAA                                 | 170               | T/C      | TGCCACGTCGTGAAAGTCTGACAA        | GTAAAAACTTTACAAGTGCT            | 44                     | 45 (T)                | 47 (C)              |
| <b>Simplex Y E3a **</b>   |                                                                                     |                   |          |                                 |                                 |                        |                       |                     |
| M149                      | F: TGCCTAACAAAACACTACACT<br>R: TTTTACTTGTTCGTGACTTTCAA <sup>a</sup>                 | 134               | G/A      | -                               | TAATAGAACACAAGC                 | 15                     | 19 (G)                | 16 (A)              |
| <b>Multiplex Y E3b*</b>   |                                                                                     |                   |          |                                 |                                 |                        |                       |                     |
| V6                        | F: ACAGCCGCCTATAGAGT<br>R: GGTCTTTGGAGGATTTTG                                       | 190               | G/C      | -                               | TTGCTGTGATTCTGATGTG             | 20                     | 21 (G)                | 23 (C)              |
| M78                       | F: TGAACACAAAATTGATACACT<br>R: TGAAAAGCAAGTACTATGAC                                 | 88                | C/T      | TGACAA                          | TTGAAATATTTGGAAGGGC             | 25                     | 26 (C)                | 27 (T)              |
| M281                      | F: CTAGAAATGCAAATTCCT<br>R: GGTTGCACAACTCAGTA                                       | 99                | G/A      | GTCTGACAA                       | ATGGGGGGAACAGGGAAAGTC           | 29                     | 30 (G)                | 31 (A)              |
| M123                      | F: ATGCTCTCAGGGGAAAAT<br>R: TGTTCCCCCATAGTTTT                                       | 167               | G/A      | GTGAAAGTCTGACAA                 | ATCTGAACTAGCATATCA              | 33                     | 34 (G)                | 39 (A)              |
| M81                       | F: CTCAGCTACACATCTCTTAACA<br>R: GGAGCAATACTGTACTTTCACT                              | 248               | C/T      | CACGTCGTGAAAGTCTGACAA           | GTGTGAGTATACTCTATGAC            | 41                     | 42 (C)                | 52 (T)              |
| <b>Simplex Y B **</b>     |                                                                                     |                   |          |                                 |                                 |                        |                       |                     |
| M60                       | F: GCACTGGCGTTCATCATCT <sup>a</sup><br>R: ATGTTTCATTATGGTTCAGGAGG <sup>a</sup>      | 388               | -/T      | -                               | TAACCACTGTGTGCCTGAT             | 19                     | 24 (-)                | 20 (T)              |
| <b>Simplex F**</b>        |                                                                                     |                   |          |                                 |                                 |                        |                       |                     |
| M213                      | F: TATAATCAAGTTACCAATTACTGGC <sup>a</sup><br>R: TTTTGTAACATTGAATGGCAAA <sup>a</sup> | 409               | T/C      | AAGTCTGACAA                     | TCAGAACTTAAAACATCTCGTTAC        | 35                     | 38 (T)                | 36 (C)              |



|      |         |   |                                                            |   |  |   |   |
|------|---------|---|------------------------------------------------------------|---|--|---|---|
| SP38 | L2a- α1 | 1 | 223T, 278T, 286T, 294T, 390A                               | + |  |   | + |
| SP28 | L2a1- 3 | 1 | 093C, 189C, 192T, 223T, 278T, 294T, 309G                   | + |  |   | + |
| SP33 | L2a1- 1 | 1 | 223T, 261T, 278T, 294T, 309G, 390A                         | + |  |   | + |
| SP35 | L2a1- 2 | 1 | 189C, 223T, 278T, 292T, 294T, 309G                         | + |  |   | + |
| SP36 | L2a1- 1 | 1 | 193T, 213A, 223T, 239T, 278T, 294T, 309G, 390A             | + |  |   | + |
| SP40 | L2a1- 1 | 5 | 223T, 278T, 294T, 309G, 390A                               | + |  |   | + |
| SP29 | L2a1a   | 1 | 158G, 223T, 286T, 294T, 309G, 390A                         | + |  |   | + |
| SP37 | L2a1a   | 1 | 223T, 278T, 286T, 294T, 309G                               | + |  |   | + |
| SP39 | L2a1a   | 1 | 223T, 274A, 278T, 286T, 294T, 309G, 320T, 390A             | + |  |   | + |
| SP42 | L2b     | 1 | 114A, 129A, 213A, 223T, 274A, 278T                         | + |  |   | + |
| SP43 | L2b     | 1 | 114A, 129A, 213A, 223T, 278T, 390A                         | + |  |   | + |
| SP41 | L2b1    | 3 | 114A, 129A, 213A, 223T, 278T, 355T, 362C                   | + |  |   | + |
| SP44 | L2b1    | 1 | 114A, 129A, 192T, 213A, 223T, 278T, 355T, 362C             | + |  |   | + |
| SP45 | L2c2    | 1 | 093C, 223T, 264T, 278T, 301T, 311C                         | + |  |   | + |
| SP46 | L2d2    | 1 | 111A, 145A, 184T, 223T, 239T, 278T, 292T, 355T, 390A, 399G | + |  | - | + |
| SP51 | L3b     | 1 | 126C, 223T, 278T, 290T, 319A, 362C                         | - |  | + |   |
| SP47 | L3b1    | 1 | 086C, 108T, 124C, 223T, 278T, 362C                         | - |  | + |   |
| SP48 | L3b1    | 1 | 124C, 150T, 223T, 278T, 362C                               | - |  | + |   |
| SP49 | L3b1    | 4 | 124C, 223T, 278T, 362C                                     | - |  | + |   |
| SP50 | L3b2    | 3 | 124C, 223T, 278T, 311C, 362C                               | - |  | + |   |
| SP52 | L3d     | 1 | 124C, 223T, 260T                                           | - |  |   |   |
| SP54 | L3d     | 1 | 124C, 223T                                                 | - |  |   |   |
| SP55 | L3d1    | 1 | 124C, 223T, 319A                                           | - |  |   |   |
| SP53 | L3d2    | 1 | 124C, 223T, 256T                                           | - |  |   |   |
| SP56 | L3e1    | 1 | 223T, 327T                                                 | - |  | + |   |
| SP57 | L3e1    | 1 | 176T, 223T, 327T                                           | - |  | + |   |
| SP58 | L3e1    | 1 | 169T, 176T, 223T, 327T                                     | - |  | + |   |
| SP59 | L3e1a   | 2 | 185T, 223T, 311C, 327T                                     | - |  | + |   |
| SP61 | L3e2    | 1 | 223T, 311C, 320T                                           | - |  | + |   |
| SP62 | L3e2    | 1 | 223T, 254G, 320T                                           | - |  | + |   |
| SP63 | L3e2    | 1 | 223T, 292T, 311C, 320T                                     | - |  | + |   |
| SP64 | L3e2    | 1 | 223T, 258T, 320T                                           | - |  | + |   |
| SP60 | L3e2a   | 3 | 223T, 320T                                                 | - |  | + |   |
| SP65 | L3e3    | 5 | 223T, 265T                                                 | - |  | + |   |
| SP66 | L3f1    | 1 | 129A, 209C, 223T, 292T, 295T, 311C                         | - |  |   |   |
| SP67 | L3f1    | 1 | 129A, 209C, 218T, 223T, 292T, 311C                         | - |  |   |   |
| SP68 | L3f1    | 2 | 209C, 218T, 223T, 256T, 292T, 311C                         | - |  |   |   |
| SP69 | A2      | 1 | 111T, 172C, 223T, 290T, 319A                               | - |  |   |   |
| SP70 | A2      | 1 | 104T, 111T, 223T, 290T, 319A, 362C                         | - |  |   |   |
| SP71 | A2      | 1 | 111T, 126C, 223T, 259T, 290T, 319A, 327T, 362C             | - |  |   |   |
| SP72 | A2      | 1 | 111T, 223T, 290T, 319A, 362C                               | - |  |   |   |
| SP73 | A5      | 1 | 187T, 223T, 290T, 319C                                     | - |  |   |   |
| SP74 | B2      | 1 | 182C, 183C, 186T, 189C, 217C, 311C                         | - |  |   |   |
| SP75 | C1      | 1 | 223T, 298C, 325C, 327T                                     | - |  |   |   |
| SP76 | C1      | 1 | 092C, 223T, 298C, 325C, 327T                               | - |  |   |   |

|      |     |   |                                    |
|------|-----|---|------------------------------------|
| SP77 | C1  | 2 | 223T, 292T, 298C, 325C, 327T       |
| SP78 | C1  | 1 | 126C, 223T, 298C, 325C, 327T       |
| SP79 | C1  | 1 | 114A, 126C, 223T, 298C, 325C, 327T |
| SP80 | D1  | 1 | 223T, 325C, 362C                   |
| SP81 | D1  | 1 | 142T, 179T, 223T, 295T, 325C, 362C |
| SP82 | U6a | 1 | 172C, 184T, 219G, 234T, 278T       |
| SP83 | K   | 1 | 093C, 224C, 311C                   |
| SP84 | T2  | 1 | 126C, 240G, 292T, 294T             |
| SP85 | V   | 1 | 298C, 355T                         |

| Haplotype | HG* | N | HVS-II sequences |
|-----------|-----|---|------------------|
|-----------|-----|---|------------------|

|      |       |   |                                                                         |
|------|-------|---|-------------------------------------------------------------------------|
| SP22 | L1c   | 1 | 073G, 151T, 152C, 182T, 186A, 189C, 240G, 247A, 263G, 291T, 297G, 315+C |
| SP29 | L2a1a | 1 | 073G, 146C, 152C, 195C, 242T, 263G, 315+C                               |
| SP71 | A2    | 1 | 073G, 146C, 153G, 235G, 263G, 315+C                                     |

\* HG- Haplogroup

\*\*All sites are described in Alves-Silva et al., 2000 except 13957 and 13803 that are described in Salas et al., 2002.

Supplementary Table 3 – African populations with which were obtained complete matches of HVSI mtDNA sequences of Brazilian Blacks from São Paulo.

| Haplotype | Phylogeography                                                                                                                                                                                                                                                                               | References                                      |
|-----------|----------------------------------------------------------------------------------------------------------------------------------------------------------------------------------------------------------------------------------------------------------------------------------------------|-------------------------------------------------|
| SP01      | Mbundu, Cabinda, Nairobi, Fali, Bantu-Mozambique, Lomwe, Ndau, Forros                                                                                                                                                                                                                        | 15,17,21,29,31,34,35                            |
| SP02      | Mbundu, Cabinda, Santiago, Bakaka, Bassa, Daba, Ewondo, Fali, Kotoko, Mafa, Podokwo, Tupuri, Uldeme, Afar, Amhara, Tigrai, Balanta, Beafada, Bijagó, Djola, Fula Preto, Mancanha, Mandinga, Mansonca, Nalu, Papel, Nairobi, Turkana, Sena, Tswa, Forros, Mandenka, Limba, Loko, Temne, Nubia | 15,17,18,19,21,22,23,24,25,27,28,31,33,34,35,37 |
| SP03      | Cabinda, Bamileke, Egyptian, Chwado, Lomwe, Makhuwa, Nguni, Shangaan                                                                                                                                                                                                                         | 15,21,27,34                                     |
| SP04      | Cabinda, Bakaka, Bamileke, Fali, Kotoko, Mafa, Uldeme, Nairobi, Kikuyu, non-Berber Moroccan, Bantu-Mozambique, Chopi, Nguni, Nyanja, Shangaan, São Tomé, Tongas, Datoga, Sukuma                                                                                                              | 15,17,19,21,22,26,29,32,34,35,37,67             |
| SP05      | Mbundu, Cabinda, Bamileke, Nairobi, Turkana, Bantu-Mozambique, Chopi, Chwabo, Lomwe, Makhuwa, Makonde, Ndau, Nguni, Nyanja, Nyungwe, Ronga, Sena, Shangaan, Shona, Tonga, Yao, São Tomé, Forros, Iraqw                                                                                       | 15,17,21,26,29,31,34,35,37,67                   |
| SP06      | Serer, Temne                                                                                                                                                                                                                                                                                 | 24,32                                           |
| SP07      | Mbundu, Cabinda, Bakaka, Bamileke, Bassa, Daba, Ewondo, Fulbe, Mandara, Tali, Uldeme, El Hierro, Gran Canaria, Egyptian, Bijagó, Fula Preto, non-Berber Moroccan, Mauritanian, Shangaan, Shona, São Tomé, Forros, Tongas, Serer, Wolof, Limba, Loko, Mende, Temne, Khwe                      | 15,20,21,24,27,28,31,32,33,34,35,67,68          |
| SP08      | Fulbe                                                                                                                                                                                                                                                                                        | 37                                              |
| SP09      | Santo Antão, Manjaco, Bantu-Mozambique, Mandenka                                                                                                                                                                                                                                             | 18,23,29,33,37                                  |
| SP11      | Forros, Mende, Temne                                                                                                                                                                                                                                                                         | 24,35                                           |
| SP12      | Santiago, Bakaka, Bassa, Fulbe, Kotoko, Nubia, Balanta, Bijagó, Brame, Fula, Futa-Fula, Mansonca, Papel, Berber, Mauritanian, Chwabo, Fulbe, Hausa, Tuareg, Yoruba, Forros, Mandenka, Serer, Wolof, Limba, Mende, Temne                                                                      | 18,19,22,23,24,27,32,33,34,35,37                |
| SP19      | Shangaan                                                                                                                                                                                                                                                                                     | 34                                              |
| SP20      | Mbundu, Forros                                                                                                                                                                                                                                                                               | 31,35                                           |
| SP23      | Cabinda, Hide, Bassa, Masa, Nairobi, Bantu-Mozambique, Lomwe, Sukuma                                                                                                                                                                                                                         | 15,17,19,21,22,26,29,34                         |
| SP24      | Hide, Mancanha, Yoruba, Limba                                                                                                                                                                                                                                                                | 19,24,33,37                                     |
| SP27      | Cabinda, Bamileke, Bantu-Mozambique, Angolares, Loko                                                                                                                                                                                                                                         | 15,21,24,29,35                                  |
| SP28      | Fulbe, Bambara                                                                                                                                                                                                                                                                               | 32,37                                           |
| SP30      | Temne                                                                                                                                                                                                                                                                                        | 24                                              |
| SP31      | Hide, Balanta, Somali, Nyanja, Sena, Shangaan, Tuareg, São Tomé, Mende, Shilluk                                                                                                                                                                                                              | 19,24,27,28,33,34,37,67                         |
| SP32      | Mbundu, Bamileke, Ewondo, Nairobi, Makhuwa, Nyanja                                                                                                                                                                                                                                           | 17,21,31,34                                     |
| SP33      | Yoruba, Soninke                                                                                                                                                                                                                                                                              | 32,37                                           |
| SP34      | Cabinda, Kotoko, Masa, Fula Preto, Fulbe, Kanuri, São Tomé                                                                                                                                                                                                                                   | 15,19,33,37,67                                  |
| SP35      | Dinka                                                                                                                                                                                                                                                                                        | 27                                              |
| SP36      | Futa Fula, Forros                                                                                                                                                                                                                                                                            | 33,35                                           |
| SP37      | Mbundu, Cabinda, Hide, Futa Fula, Papel, Bantu-Mozambique, Chwabo, Makonde, Ndau, Nyanja, Nyungwe, Ronga, Sena, Shona, Tswa, Songhai, Tongas, Bambara, Mende                                                                                                                                 | 15,19,24,29,31,32,33,34,35,37                   |

|      |                                                                                                                                                                                                                                                                                                                   |                                              |
|------|-------------------------------------------------------------------------------------------------------------------------------------------------------------------------------------------------------------------------------------------------------------------------------------------------------------------|----------------------------------------------|
| SP38 | Bantu-Mozambique, Tswa, Yoruba                                                                                                                                                                                                                                                                                    | 29,34,37                                     |
| SP40 | Mbundu, Bubi, São Nicolau, Bamileke, Fulbe, Hide, Tali, Tupuri, Gran Canaria, Tenerife, Amhara, Balanta, Cassanga, Fula, Futa Fula, Kikuyu, Somali, Moroccan Souss, Chwabo, Lomwe, Makonde, Ndaou, Nyungwe, Shangaan, Shona, Fulbe, Tuareg, Forros, Bambara, Mandenka, Serer, Wolof, Mende, Limba, Nubia, Saharan | 16,18,19,21,24,25,27,31,32,33,34,35,37,67,68 |
| SP41 | Cabinda, Santiago, Mafa, Baiote, Balanta, Beafada, Brame, Manjaco, Mansonca, Nalu, Papel, Yoruba, Tongas, Wolof                                                                                                                                                                                                   | 15,18,19,32,33,35,37                         |
| SP42 | Cabinda, Fali, Fulbe, Hide, Mafa, Bantu-Mozambique, Chopi, Tonga                                                                                                                                                                                                                                                  | 15,19,21,22,29,34                            |
| SP43 | Fogo, Santiago, Balanta, Djola, Manjaco, Mandinka, Moroccan Souss, Diola, Wolof                                                                                                                                                                                                                                   | 16,18,32,33                                  |
| SP46 | Mandara, Balanta, Mandinga, Tongas, Wolof                                                                                                                                                                                                                                                                         | 21,32,33,35                                  |
| SP49 | Fogo, Maio, Santiago, Bamileke, Daba, Ewondo, Fali, Fulbe, Mafa, Mandara, Masa, Podokwo, Balanta, Djola, Futa Fula, Mandinga, Nalú, Nairobi, Moroccan Souss, Mauritanian, Makonde, Fulbe, Hausa, Kanuri, Songhai, Forros, Bambara, Diola, Peul, Tukolor, Wolof, Mende, Temne                                      | 16,17,18,19,21,22,24,32,33,34,35,37          |
| SP50 | Ewondo, Fali, Fulbe, Mandara, Masa, Tali, Nubia, Futa Fula, Bantu-Mozambique, Ndaou, Hausa, Forros                                                                                                                                                                                                                | 19,21,22,27,29,33,34,35,37                   |
| SP53 | Cabinda, Fogo, Bakaka, Bamileke, Bassa, Fali, Fulbe, Afar, Amhara, non-Berber Moroccan, Mandenka, Serer, Loko                                                                                                                                                                                                     | 15,18,21,24,25,32,37                         |
| SP54 | Santiago, Bakaka, Bassa, Fulbe, Banhu, Mandinga, Chopi, Ndaou, Tswa, Mandenka, Soce, Wolof, Temne                                                                                                                                                                                                                 | 18,22,23,24,28,32,33,34,37                   |
| SP55 | Mbundu, Oromo, Mansonca, Fulbe, Chopi, Chwabo, Nyanja, Nyungwe, Sena, Shangaan, Tswa, Sukuma                                                                                                                                                                                                                      | 25,26,31,33,34,37                            |
| SP56 | Mbundu, Cabinda, Hide, Mafa, Bantu-Mozambique, Lomwe, Nyungwe, Shangaan, Tswa                                                                                                                                                                                                                                     | 15,19,29,31,34                               |
| SP57 | Cabinda, Bassa, Bantu-Mozambique, Shangaan                                                                                                                                                                                                                                                                        | 15,21,22,29,34                               |
| SP59 | Cabinda, Nairobi, Bamileke, Bantu-Mozambique, Lomwe                                                                                                                                                                                                                                                               | 15,17,21,29,34                               |
| SP60 | Fogo, Santiago, São Nicolau, Santo Antão, Bakaka, Bamileke, Fulbe, Uideme, Baiote, Balanta, Bijagó, Djola, Fula, Mandinga, Nalú, Fulbe, Hausa, Tuareg, São Tomé, Forros, Mandenka, Diola                                                                                                                          | 18,21,22,23,32,33,35,37,67                   |
| SP61 | Bubi, Bassa, Fali, Fulbe, Mandara, Masa, Tali, Tupuri                                                                                                                                                                                                                                                             | 19,21,22,67                                  |
| SP64 | São Tomé                                                                                                                                                                                                                                                                                                          | 67                                           |
| SP65 | Bubi, Cabinda, Bakaka, Bamileke, Bassa, Nairobi, Bantu-Mozambique, Chopi, Chwabo, Makonde, Nguni, Sena, Yao, Forros, Tongas                                                                                                                                                                                       | 15,17,21,22,29,34,35,67                      |
| SP66 | Cabinda, Bassa, Turkana, Bantu-Mozambique, Mende                                                                                                                                                                                                                                                                  | 15,22,24,29,37                               |
| SP68 | Cabinda, Bantu-Mozambique, Shona                                                                                                                                                                                                                                                                                  | 15,29, 34                                    |

**Supplementary Table 4** - Major sub-Saharan African mtDNA haplogroups and their distributions in Black Brazilians (SP) and 18 African populations\*

| Haplogroup      | African Populations |       |       |       |       |       |       |       |       |       |       |       |       |       |       |       |       |       |       |
|-----------------|---------------------|-------|-------|-------|-------|-------|-------|-------|-------|-------|-------|-------|-------|-------|-------|-------|-------|-------|-------|
|                 | SP                  | 1     | 2     | 3     | 4     | 5     | 6     | 7     | 8     | 9     | 10    | 11    | 12    | 13    | 14    | 15    | 16    | 17    | 18    |
| L0              |                     |       |       |       |       |       |       |       |       |       |       |       |       |       |       |       |       |       |       |
| L0a             |                     |       |       |       |       |       | 0.006 |       | 0.033 |       |       |       | 0.018 |       |       |       |       |       |       |
| L0a1            | 0.088               | 0.045 | 0.111 | 0.103 | 0.100 | 0.044 | 0.097 |       |       |       |       |       |       | 0.018 | 0.033 | 0.015 | 0.051 | 0.055 |       |
| L0a2            | 0.039               | 0.068 |       | 0.028 | 0.100 |       | 0.177 |       |       |       |       |       |       |       |       |       |       |       |       |
| L0d             |                     |       |       |       |       |       | 0.038 |       |       |       |       |       |       |       |       |       |       |       |       |
| L0d1            |                     |       |       |       |       |       | 0.013 |       |       |       |       |       |       |       |       |       |       |       |       |
| L0d2            |                     |       |       |       |       |       | 0.003 |       |       |       |       |       |       |       |       |       |       |       |       |
| L1b             | 0.049               | 0.045 |       | 0.018 |       |       | 0.006 |       | 0.067 | 0.048 |       | 0.027 | 0.027 | 0.075 | 0.100 | 0.046 | 0.017 | 0.015 |       |
| L1b1            | 0.039               |       | 0.111 | 0.009 | 0.060 | 0.066 | 0.006 | 0.100 | 0.135 | 0.024 | 0.210 | 0.163 | 0.178 | 0.205 | 0.133 | 0.015 | 0.103 | 0.099 | 0.067 |
| L1c             | 0.049               |       | 0.111 | 0.028 |       |       | 0.003 |       |       |       |       |       |       |       | 0.067 |       | 0.026 |       |       |
| L1c1            | 0.078               | 0.045 | 0.111 | 0.085 | 0.020 | 0.109 | 0.019 |       | 0.033 | 0.048 |       |       |       |       | 0.018 | 0.068 | 0.046 | 0.043 | 0.055 |
| L1c2            | 0.039               | 0.093 | 0.111 | 0.123 | 0.080 | 0.120 | 0.019 |       |       |       |       |       |       |       |       |       |       |       |       |
| L1c3            |                     | 0.023 |       | 0.009 |       |       | 0.013 |       |       |       |       |       |       |       |       |       |       |       |       |
| L1c4            |                     |       |       |       |       |       |       |       |       |       |       |       |       |       |       |       |       |       |       |
| L1c5            |                     |       |       | 0.009 | 0.040 |       |       |       |       |       |       |       |       |       |       |       |       |       |       |
| L2a- $\alpha$ 1 | 0.049               | 0.045 |       | 0.018 |       |       | 0.006 | 0.200 | 0.033 |       |       | 0.027 | 0.054 | 0.018 | 0.033 |       |       |       | 0.023 |
| L2a- $\alpha$ 2 |                     |       |       | 0.020 |       |       |       |       |       | 0.024 |       | 0.054 |       |       | 0.100 | 0.031 | 0.043 | 0.018 |       |
| L2a- $\alpha$ 3 | 0.029               |       |       |       |       |       | 0.010 |       |       | 0.052 |       | 0.027 | 0.037 | 0.068 | 0.077 | 0.043 | 0.003 |       |       |
| L2a1a           | 0.029               | 0.068 |       | 0.009 |       |       | 0.091 | 0.100 | 0.033 | 0.024 |       |       |       |       |       |       |       | 0.006 | 0.067 |
| L2a1b           |                     |       |       |       |       |       | 0.129 |       |       |       |       | 0.018 |       |       |       |       |       | 0.009 |       |
| L2a1- $\beta$ 1 | 0.069               | 0.023 |       | 0.009 | 0.060 | 0.043 | 0.031 |       | 0.100 | 0.024 | 0.158 | 0.108 | 0.036 | 0.111 | 0.033 | 0.077 | 0.008 | 0.081 |       |
| L2a1- $\beta$ 2 | 0.01                | 0.045 |       |       |       | 0.043 | 0.010 |       | 0.067 | 0.048 | 0.052 | 0.081 |       | 0.018 | 0.033 | 0.046 | 0.051 | 0.026 | 0.067 |
| L2a1- $\beta$ 3 | 0.01                | 0.068 |       | 0.009 | 0.020 | 0.065 | 0.013 |       | 0.033 | 0.071 |       | 0.027 | 0.009 | 0.018 |       |       | 0.034 | 0.020 | 0.196 |
| L2b             | 0.02                | 0.045 |       | 0.009 | 0.020 |       | 0.013 |       |       | 0.071 |       | 0.081 |       | 0.018 | 0.033 | 0.015 |       | 0.023 |       |
| L2b1            | 0.039               |       |       | 0.057 |       |       |       |       | 0.033 | 0.048 | 0.215 | 0.108 | 0.027 |       |       | 0.031 | 0.008 | 0.060 |       |
| L2c             |                     |       |       | 0.020 | 0.022 |       |       |       | 0.071 | 0.052 | 0.027 | 0.293 | 0.037 |       |       | 0.124 | 0.120 | 0.135 | 0.067 |
| L2c1            |                     |       |       |       |       |       |       |       | 0.027 | 0.062 |       |       |       |       |       | 0.017 | 0.006 |       |       |

|       |       |       |       |       |       |       |       |       |       |       |       |       |       |       |       |       |       |       |
|-------|-------|-------|-------|-------|-------|-------|-------|-------|-------|-------|-------|-------|-------|-------|-------|-------|-------|-------|
| L2c2  | 0.01  |       | 0.018 |       |       | 0.006 |       | 0.024 |       | 0.027 | 0.018 | 0.033 | 0.062 | 0.017 | 0.015 |       |       |       |
| L2d1  |       |       |       |       | 0.043 | 0.010 |       | 0.048 |       |       |       |       |       | 0.026 | 0.015 | 0.067 |       |       |
| L2d2  | 0.01  |       |       |       |       |       | 0.100 |       | 0.081 |       | 0.056 | 0.033 | 0.015 | 0.034 | 0.006 |       |       |       |
| L3    |       |       |       | 0.120 | 0.130 | 0.013 |       |       |       |       |       |       |       | 0.037 |       |       |       |       |
| L3b   | 0.059 | 0.023 |       | 0.038 | 0.020 | 0.022 | 0.025 | 0.100 | 0.165 | 0.054 | 0.027 | 0.094 | 0.100 | 0.124 | 0.094 | 0.049 | 0.067 |       |
| L3b1  | 0.01  |       |       |       |       |       |       | 0.033 | 0.071 | 0.105 |       | 0.027 | 0.018 |       | 0.046 | 0.008 | 0.040 | 0.067 |
| L3b2  | 0.029 |       |       |       |       |       |       |       |       |       |       | 0.009 |       |       |       |       | 0.003 | 0.067 |
| L3d   | 0.02  | 0.023 |       | 0.009 |       |       | 0.025 | 0.200 | 0.133 | 0.024 | 0.054 | 0.045 | 0.056 | 0.033 | 0.046 | 0.068 | 0.055 | 0.067 |
| L3d1  | 0.01  | 0.023 |       | 0.009 |       |       | 0.038 |       |       |       |       |       |       |       |       |       |       | 0.012 |
| L3d2  | 0.01  |       |       | 0.009 |       |       |       |       | 0.024 | 0.052 |       | 0.036 | 0.018 | 0.100 | 0.015 | 0.043 |       |       |
| L3d3  |       | 0.023 |       | 0.028 |       |       | 0.003 |       |       |       |       | 0.026 |       |       |       |       |       | 0.030 |
| L3e1  | 0.029 | 0.068 |       | 0.047 | 0.040 | 0.065 | 0.028 |       | 0.033 |       |       |       |       |       | 0.031 |       |       |       |
| L3e1a | 0.02  | 0.045 |       | 0.038 |       |       | 0.038 |       |       |       |       |       |       |       |       |       |       |       |
| L3e1b |       |       |       | 0.038 | 0.040 | 0.022 | 0.028 |       |       |       |       |       |       |       |       |       |       |       |
| L3e2  | 0.069 | 0.023 | 0.111 |       | 0.040 |       | 0.010 | 0.100 | 0.100 | 0.024 |       | 0.054 | 0.009 |       | 0.015 | 0.008 | 0.030 | 0.067 |
| L3e2b |       |       |       | 0.075 |       |       |       |       |       |       |       |       | 0.056 |       |       | 0.078 | 0.018 |       |
| L3e3  | 0.049 | 0.068 |       | 0.018 | 0.060 | 0.043 | 0.038 |       | 0.067 |       | 0.052 |       | 0.009 |       |       |       |       | 0.067 |
| L3e4  |       |       |       | 0.009 | 0.080 |       |       |       |       | 0.024 | 0.052 | 0.027 | 0.036 |       | 0.077 |       | 0.033 |       |
| L3f   |       | 0.023 | 0.334 | 0.075 | 0.020 | 0.066 | 0.025 | 0.100 | 0.067 | 0.095 |       |       |       |       |       |       |       | 0.067 |
| L3f1  | 0.039 |       |       | 0.057 | 0.020 | 0.043 | 0.010 |       |       |       |       |       | 0.056 |       | 0.046 | 0.060 | 0.023 |       |
| L3h   |       |       |       |       |       |       |       |       |       |       |       |       |       |       |       |       |       | 0.037 |
| L5a1  |       | 0.023 |       |       |       |       |       |       |       |       |       |       |       |       |       |       |       |       |
| L7    |       | 0.045 |       | 0.009 | 0.020 | 0.022 |       |       |       |       |       |       | 0.018 |       |       |       |       |       |

\*The numbers correspond to the following African populations: 1-Angola [31], N=44; 2-Fang [30], N=9 (Equatorial Guinea); 3-Cabinda [15], N= 106 (Cabinda, former Portuguese protectorate); 4- Bakaka [21], N=50 (Cameroon); 5-Bassa [21], N= 46 (Cameroon); 6- Mozambique [34], N=307; 7- Kanuri [37], N=10 (Niger, Nigeria); 8-Yoruba [36, 37], N= 30 (Nigeria); 9- Senegalese [32], N= 42 (Senegal); 10- Serer [32], N= 19 (Senegal); 11-Wolof [32], N= 37 (Senegal); 12- Mandenka [23], N= 112 (Senegal); 13- Mende [24], N=53 (Sierra Leone); 14- Loko [24], N=30 (Sierra Leone); 15- Limba [24], N=65 (Sierra Leone); 16- Temne [24], N=117 (Sierra Leone); 17-Twenty two ethnic groups from Guinea-Bissau [33], N=350 (Guinea-Bissau); 18- Hausa [37], N=15 (Niger, Nigeria).

**Supplementary Table 5** - Major sub-Saharan African Y chromosome haplogroups and their distributions in Black Brazilians and twenty African populations\*

| Population (country)                 | N   | E3* | E3a * | E3a7 | E1* | E2* | E3b* | E3b1* | E3b2* | B*  | Others |
|--------------------------------------|-----|-----|-------|------|-----|-----|------|-------|-------|-----|--------|
|                                      |     | (%) | (%)   | (%)  | (%) | (%) | (%)  | (%)   | (%)   | (%) | (%)    |
| São Paulo (Brazil)                   | 120 | 0   | 23    | 20   | 1   | 1   | 1    | 4     | 3     | 3   | 44     |
| <b>West Africa</b>                   |     |     |       |      |     |     |      |       |       |     |        |
| Wolof (Gambia/Senegal)               | 34  | 3   | 68    | 0    | 12  | 3   | 6    | 0     | 6     | 0   | 2      |
| Mandinka (Gambia/Senegal)            | 39  | 0   | 79    | 0    | 3   | 0   | 0    | 5     | 3     | 3   | 7      |
| Ewe (Ghana)                          | 30  | 3   | 73    | 23   | 0   | 0   | 0    | 0     | 0     | 0   | 1      |
| Ga (Ghana)                           | 29  | 0   | 62    | 34   | 3   | 0   | 0    | 0     | 0     | 0   | 1      |
| Fante (Ghana)                        | 32  | 3   | 44    | 41   | 3   | 0   | 3    | 0     | 0     | 0   | 6      |
| Fon (Benin)                          | 100 | 0   | 38    | 57   | 0   | 5   | 0    | 0     | 0     | 0   | 0      |
| Mossi (Burkina Faso)                 | 49  | 2   | 68    | 22   | 0   | 4   | 2    | 0     | 0     | 2   | 0      |
| Rimaibe (Burkina Faso)               | 37  | 3   | 57    | 8    | 5   | 27  | 0    | 0     | 0     | 0   | 0      |
| <b>West-Central Africa</b>           |     |     |       |      |     |     |      |       |       |     |        |
| Mixed-Adamawa (Cameroon)             | 18  | 0   | 28    | 0    | 0   | 0   | 0    | 0     | 0     | 12  | 60     |
| Fali (Cameroon)                      | 39  | 0   | 26    | 33   | 0   | 0   | 0    | 0     | 0     | 18  | 23     |
| Tali (Cameroon)                      | 15  | 0   | 53    | 20   | 20  | 0   | 0    | 0     | 0     | 0   | 7      |
| Tupuri (Cameroon)                    | 21  | 0   | 0     | 0    | 0   | 0   | 0    | 0     | 0     | 11  | 89     |
| Ewondo (Cameroon)                    | 29  | 0   | 66    | 21   | 0   | 0   | 0    | 0     | 0     | 10  | 3      |
| Bakaka (Cameroon)                    | 29  | 0   | 59    | 41   | 0   | 0   | 0    | 0     | 0     | 0   | 0      |
| Bamileke (Cameroon)                  | 133 | 0   | 52    | 46   | 0   | 0   | 0    | 0     | 0     | 1   | 0      |
| Bantu (Cameroon)                     | 14  | 0   | 57    | 21   | 0   | 0   | 0    | 0     | 0     | 0   | 22     |
| Bassa (Cameroon)                     | 11  | 0   | 55    | 36   | 0   | 0   | 0    | 0     | 0     | 0   | 9      |
| Ngoumba (Cameroon)                   | 31  | 0   | 39    | 32   | 0   | 6   | 0    | 0     | 0     | 23  | 0      |
| Nande (Democratic Republic of Congo) | 18  | 0   | 33    | 37   | 0   | 0   | 0    | 0     | 0     | 0   | 30     |
| Hema (Democratic Republic of Congo)  | 18  | 0   | 17    | 11   | 0   | 39  | 28   | 0     | 0     | 0   | 5      |

\*The African population data were compiled from Cruciani et al. [49], Luis et al. [50], Beleza et al [15] and Wood et al. [51]
